# Supplementary material for: Antigen-dependent and –independent contributions to primary memory CD8 T cell activation and protection following infection
Source: PubMed Central journal article supplement (PMC4675085; doi:10.1038/srep18022), 2015-12-10
Supplement: srep18022-s1.pdf [file srep18022-s1.pdf]

**Antigen-dependent and -independent contributions to primary memory CD8 T cell activation and protection following infection**

Matthew D. Martin and Vladimir P. Badovinac

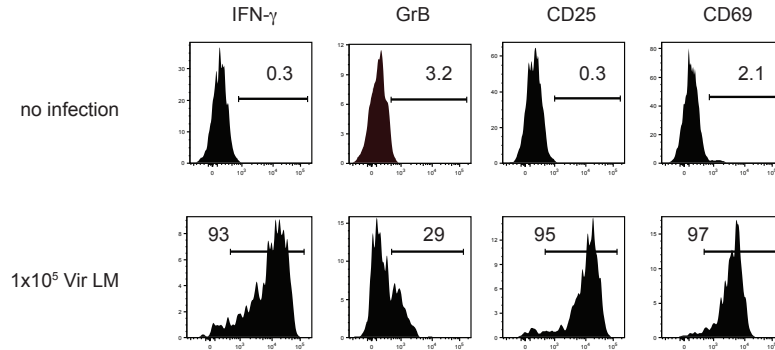

**Supplemental Figure 1. P14 responses are driven by 2<sup>o</sup> infection.** Memory P14 cells were generated by transferring naive P14 cells into mice followed by LCMV infection. Mice either received 2<sup>o</sup> infection with 1x10<sup>5</sup> CFU Vir LM or did not receive secondary infection. Representative histograms of IFN- $\gamma$ , GrB, CD25, and CD69 expression on splenocytes.
